# Supplementary material for: Anthocyanin bio-fortified colored wheat: Nutritional and functional characterization
Source: PubMed Central journal article supplement (PMC5884506; doi:10.1371/journal.pone.0194367), 2018-04-04
Supplement: pone.0194367.s001.pdf [file pone.0194367.s001.pdf]

### S1 Table

|                   | <b>PC1</b>   | <b>PC2</b>   |
|-------------------|--------------|--------------|
| <b>TAC</b>        | <b>0.896</b> | -0.316       |
| <b>SPC</b>        | <b>0.730</b> | 0.314        |
| <b>%IN(DPPH)</b>  | <b>0.919</b> | -0.067       |
| <b>TROx(DPPH)</b> | <b>0.920</b> | -0.088       |
| <b>%IN(ABTS)</b>  | <b>0.696</b> | <b>0.679</b> |
| <b>TROx(ABTS)</b> | <b>0.696</b> | <b>0.679</b> |
| <b>IN(PCL)</b>    | <b>0.857</b> | -0.439       |
| <b>Abs(PCL)</b>   | <b>0.863</b> | -0.432       |
