# Supplementary material for: Anthocyanin bio-fortified colored wheat: Nutritional and functional characterization
Source: PubMed Central journal article supplement (PMC5884506; doi:10.1371/journal.pone.0194367), 2018-04-04
Supplement: pone.0194367.s002.pdf [file pone.0194367.s002.pdf]

## S2 Table

| Variables  | TAC          | SPC          | %IN (DPPH)   | TROx (DPPH)  | %IN (ABTS)   | TROx (ABTS)  | IN (PCL)     | Abs (PCL)    |
|------------|--------------|--------------|--------------|--------------|--------------|--------------|--------------|--------------|
| TAC        | 1            | 0.447        | <b>0.804</b> | <b>0.808</b> | 0.454        | 0.454        | <b>0.911</b> | <b>0.915</b> |
| SPC        | 0.447        | 1            | <b>0.647</b> | <b>0.646</b> | <b>0.607</b> | <b>0.607</b> | <b>0.483</b> | <b>0.487</b> |
| %IN(DPPH)  | <b>0.804</b> | <b>0.647</b> | 1            | <b>0.998</b> | <b>0.541</b> | <b>0.541</b> | <b>0.722</b> | <b>0.728</b> |
| TROx(DPPH) | <b>0.808</b> | <b>0.646</b> | <b>0.998</b> | 1            | <b>0.527</b> | <b>0.527</b> | <b>0.734</b> | <b>0.740</b> |
| %IN(ABTS)  | <b>0.454</b> | <b>0.607</b> | <b>0.541</b> | <b>0.527</b> | 1            | <b>1.000</b> | 0.335        | 0.344        |
| TROx(ABTS) | <b>0.454</b> | <b>0.607</b> | <b>0.541</b> | <b>0.527</b> | <b>1.000</b> | 1            | 0.335        | 0.344        |
| IN(PCL)    | <b>0.911</b> | <b>0.483</b> | <b>0.722</b> | <b>0.734</b> | 0.335        | 0.335        | 1            | <b>1.000</b> |
| Abs(PCL)   | <b>0.915</b> | <b>0.487</b> | <b>0.728</b> | <b>0.740</b> | 0.344        | 0.344        | <b>1.000</b> | 1            |

Values in bold are different from 0 with a significance level  $\alpha=0.05$ . Values in bold within the same factor indicate the variable with the largest correlation
