# Supplementary material for: Anthocyanin bio-fortified colored wheat: Nutritional and functional characterization
Source: PubMed Central journal article supplement (PMC5884506; doi:10.1371/journal.pone.0194367), 2018-04-04
Supplement: pone.0194367.s003.pdf [file pone.0194367.s003.pdf]

### S3 Table

| Variables     | TAC          | SPC      | NO (%)       | IL6- $\alpha$ | TNF- $\alpha$ |
|---------------|--------------|----------|--------------|---------------|---------------|
| TAC           | <b>1</b>     | 0.328    | <b>0.872</b> | 0.400         | 0.429         |
| SPC           | 0.328        | <b>1</b> | 0.313        | -0.348        | -0.181        |
| NO (%)        | <b>0.872</b> | 0.313    | <b>1</b>     | <b>0.595</b>  | 0.322         |
| IL6- $\alpha$ | 0.400        | -0.348   | <b>0.595</b> | <b>1</b>      | <b>0.678</b>  |
| TNF- $\alpha$ | 0.429        | -0.181   | 0.322        | <b>0.678</b>  | <b>1</b>      |

Values in bold are different from 0 with a significance level  $\alpha=0.05$
