# Supplementary material for: Anthocyanin bio-fortified colored wheat: Nutritional and functional characterization
Source: PubMed Central journal article supplement (PMC5884506; doi:10.1371/journal.pone.0194367), 2018-04-04
Supplement: pone.0194367.s004.pdf [file pone.0194367.s004.pdf]

## S4 Table

|                      | PC1           | PC2          |
|----------------------|---------------|--------------|
| Carbohydrate (%)     | <b>-0.934</b> | -0.227       |
| SUGAR(%)             | <b>-0.655</b> | -0.283       |
| Protein(%)           | <b>0.945</b>  | 0.315        |
| Ash(%)               | -0.441        | <b>0.678</b> |
| Dietry Fiber(%)      | -0.301        | <b>0.670</b> |
| wet gluten (%)       | <b>0.943</b>  | 0.310        |
| Alveograph test      | <b>0.597</b>  | -0.639       |
| Vitamin B3 (mg/100g) | -0.142        | <b>0.577</b> |
| Vitamin B5 (mg/100g) | 0.369         | 0.248        |
| vitamin E(mg/100g)   | <b>0.547</b>  | -0.489       |
| SDSS                 | <b>0.770</b>  | 0.420        |
| Phosphate (mg/Kg)    | -0.346        | 0.379        |
| Phytic acid (mg/Kg)  | -0.347        | 0.381        |
| Iron (mg/Kg)         | -0.900        | 0.233        |
| Zinc (mg/Kg)         | -0.800        | 0.154        |
| Copper (mg/Kg)       | 0.245         | <b>0.901</b> |
| Manganese (mg/Kg)    | 0.222         | <b>0.918</b> |
